# Supplementary material
Source: Springer Nature journal article supplement (https://www.springermedizin.de/resource/supplementary/13256_2012_2545_MOESM4_ESM.pdf/9649888)
Supplement: MOESM4 [file 9649888]

**Emergency lung separation required**

**AND**

**Contraindication or unsuccessful orotracheal intubation**

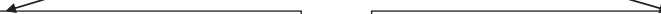

**1. Insert dedicated lung isolation device directly through tracheostomy stoma e.g.**

- \* DLT with or without carenal hook e.g. Robertshaw<sup>®</sup>, Mallinkrodt-Tyco<sup>®</sup>, Portex<sup>®</sup>
- \* Tracheopart<sup>®</sup> -a specifically designed DLT for use through a tracheostomy stoma
- \* Univent<sup>®</sup> Torque control bronchial blocker
- \* Single lumen endobronchial tube

**2. Insert dedicated tracheostomy tube/cannula and use bronchial blocker through tracheostomy tube for lung separation e.g.**

- \* Arndt<sup>®</sup> wire guided bronchial blocker
- \* Cohen<sup>®</sup> endobronchial blocker
- \* Fuji<sup>®</sup> endobronchial blocker

**3. Insert conventional selective single lumen endotracheal tube through tracheostomy stoma and use bronchial blocker for lung separation**

- \* Arndt<sup>®</sup> wire guided bronchial blocker
- \* Cohen<sup>®</sup> endobronchial blocker
- \* Fuji<sup>®</sup> endobronchial blocker
- \* Univent<sup>®</sup> Torque control bronchial blocker

**1. Insert conventional nasal ETT and use bronchial blocker through nasal ETT for lung separation e.g.**

- \* Arndt<sup>®</sup> wire guided bronchial blocker
- \* Cohen<sup>®</sup> endobronchial blocker
- \* Fuji<sup>®</sup> endobronchial blocker

**2. Insert selective nasal single lumen endobronchial tube e.g.**

- \*Rusch<sup>®</sup> single lumen nasa endobronchial tube
